# Supplementary material
Source: PubMed Central journal article supplement (PMC2758761)
Supplement: M900179-MCP200v2_1.pdf [file M900179-MCP200v2_1.pdf]

# Supplemental Figure 1

**a**

```

1  MKTFTLPASV  LFCFLLLLRG  LGAAPPGRSD  VYPPPLGSEH  NGQVAEDAVS  RPKDDSVPEV
61  RAARNSEPQD  QGELFQGVDP  RALAAVLLQA  LDRPASPPAV  PAGSQQGTPE  EAAEALLTES
121 VRSQTHSLPA  SEIQASAVAP  PRPQTQDNDP  EADDRSEELE  ALASLLQELR  DFSPSNAKRQ
181 QETAAAETET  RHTLTRVNL  ESPGPERVWR  ASWGEFQARV  PERAPLPPSV  PSQFQARMSE
241 NVPLPEHQF  GEGVSSPKTH  LGETLTPLSK  AYQSLAPFP  KVRRLEGSFL  GGSEAGERLL
301 QQGLAQVEAG  RRQAEATRQA  AAQEERLADL  ASDLLLQYLL  QAGARQDRLG  GRGLQETQQE
361 RENEREAAA  QERRGGGEDE  VGEEDDEAAA  AEAEAAAER  ARQNALLFAE  EEDGEAGAED
421 KRSQEEAPGH  RRKDAEGTEE  GGEEDDDDEE  MDPQTIDSLI  ELSTKLHLPA  DDVVSIIIEV
481 EEKRRKRKNA  PPEPVPPPPR  APAPTHVRSR  QPPPPAPARD  ELPDWNVEVLP  PWDREEDVFP
541 PPGPYHFPFN  YIRPRTLQPP  ASSRRRHFFH  ALPPARHHPD  LEAQARRAQE  EADAEERLQ
601 EQEELNYIE  HVLLHRP
    
```

**b**

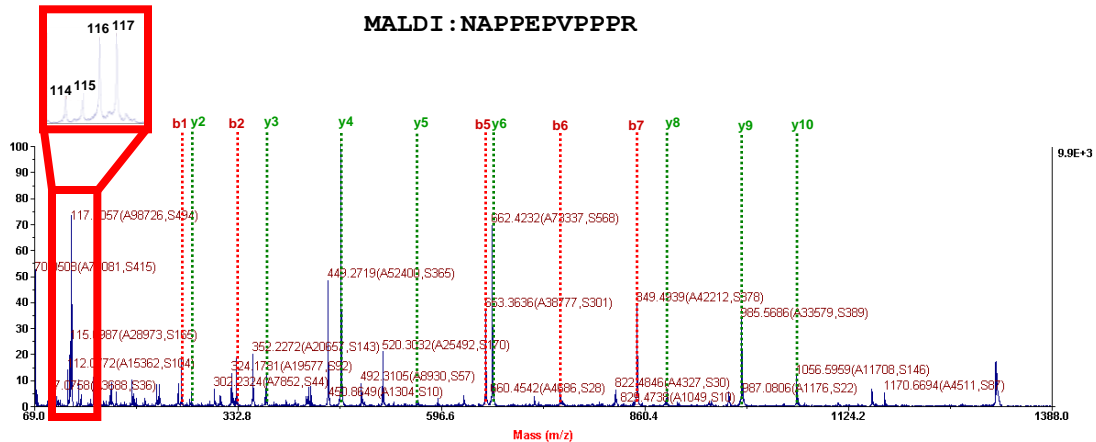

**c**

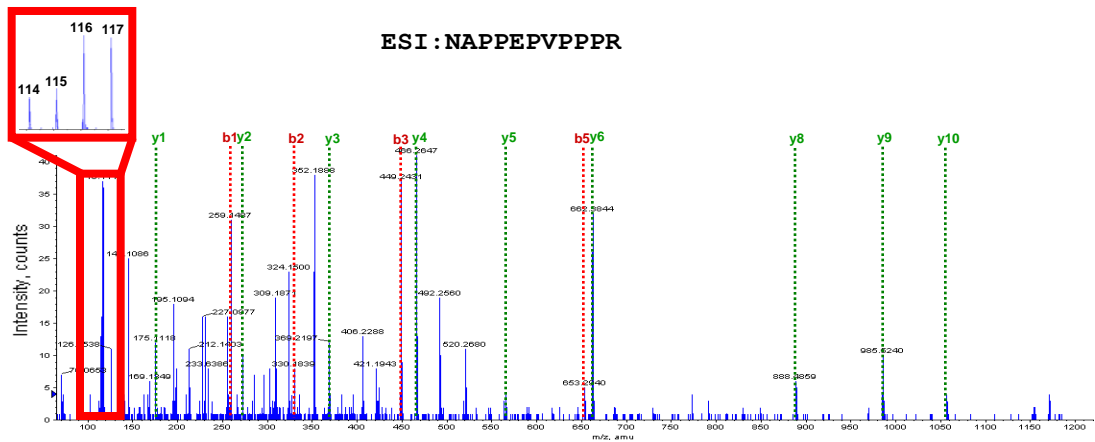

Quantitative analysis of differentially-expressed proteins in NGF-treated PC12 cells by iTRAQ method based on LC-MALDI or LC-ESI MS/MS analysis. (A) Amino acid sequence of VGF (Swiss-Prot accession number P20156) identified by LC-MALDI or LC-ESI MS/MS analysis. Green sequences were identified by both LC-MALDI and LC-ESI MS/MS analysis. Red and blue sequences were identified by only LC-MALDI and LC-ESI MS/MS analysis, respectively. (B, C) Example tandem mass (MS/MS) spectra of the precursor ion NAPPEPVPPPP identified as VGF by LC-MALDI (B) and LC-ESI (C) MS/MS analysis were shown. Expanded views of the low-*m/z* end of the MS/MS spectrum show relative abundances of the signature iTRAQ ions at 114.1, 115.1, 116.1, and 117.1 *m/z*.

# Supplemental Figure 2

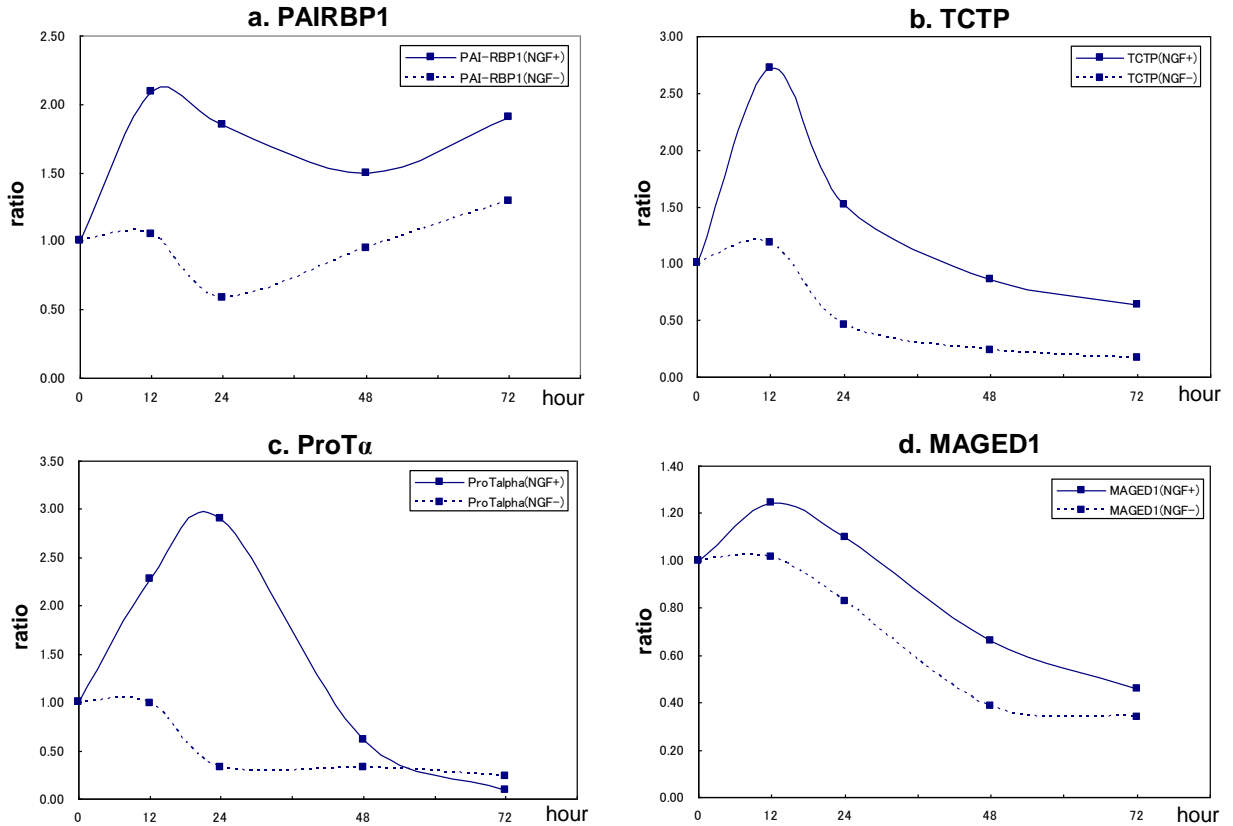

**Quantitative time course analysis of PAIRBP1, TCTP, ProTα and MAGED1 by Western blotting in NGF-stimulated PC12 cells.** Cell lysates were prepared at different time points as indicated. The ratios were calculated by the intensities of the protein bands shown in Fig. 4A. The intensities at 0 hours (before NGF stimulation) were determined to be the standard (the ratio = 1.0).
